# Supplementary material for: Multifunctional Nano-engineered Polymer Surfaces with Enhanced Mechanical Resistance and Superhydrophobicity
Source: PubMed Central journal article supplement (PMC5337973; doi:10.1038/srep43450), 2017-03-06
Supplement: srep43450-s1.pdf [file srep43450-s1.pdf]

## **Supplementary Information**

### **Multifunctional Nanoengineered Surfaces with Enhanced Mechanical Durability and Superhydrophobicity**

Jaime J. Hernández<sup>1</sup>, Miguel A. Monclús<sup>2</sup>, Ivan Navarro-Baena<sup>1</sup>, Felipe Viela<sup>1</sup>, Jon M. Molina-Aldareguia<sup>2</sup>, Isabel Rodríguez<sup>1\*</sup>

<sup>1</sup>Madrid Institute for Advanced Studies in Nanoscience (IMDEA Nanoscience),  
C/Faraday 9, Ciudad Universitaria de Cantoblanco. 28049 Madrid

<sup>2</sup>Madrid Institute for Advanced Studies in Materials (IMDEA Materials),  
C/ Eric Kandel, 2, Tecnogetafe, Getafe. 28906 Madrid

**Supplementary Video S1** Video of a water droplet sliding off a PS-CNT high aspect ratio micropillared surface

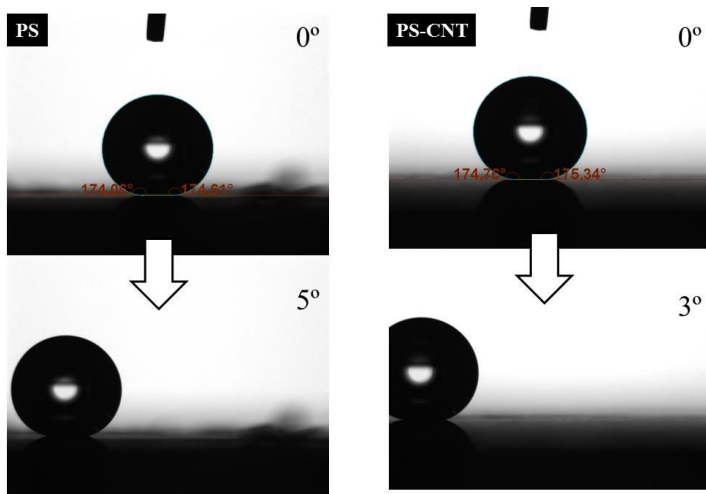

**Supplementary Figure S2.** Images of 4  $\mu\text{L}$  droplets sliding over PS and PS-CNT composite imprinted micro pillar surfaces. Tilting angles are indicated in each image.

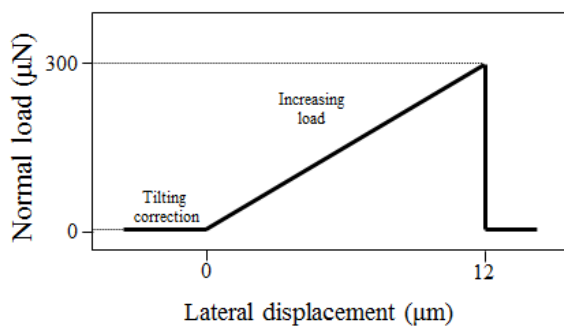

**Supplementary Figure S3.** Load profile employed during nanoscratch tests.

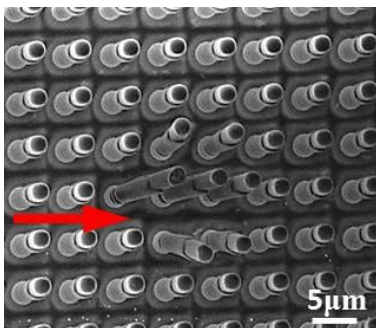

**Supplementary Figure S4** SEM image of the indentation left during the nanoscratch tests performed in a PS-CNT microstructured film. Red arrow indicated the scratch direction.

**Supplementary Table S5.** Structural parameters of the PVDF-RGO nanocomposite derived from the X-ray measurements

| <b>hkl</b>                         | <b>d<sub>exp</sub></b> | <b>d<sub>calc</sub></b> |
|------------------------------------|------------------------|-------------------------|
|                                    | <b>[nm]</b>            | <b>[nm]</b>             |
| <b>100 <math>\alpha</math></b>     | 0.49                   | 0.50                    |
| <b>020 <math>\alpha</math></b>     | 0.47                   | 0.48                    |
| <b>110 <math>\alpha</math></b>     | 0.44                   | 0.44                    |
| <b>120/021 <math>\alpha</math></b> | 0.32                   | 0.32                    |

**Supplementary Table S6.** Structural parameters of the PVDF derived from the X-ray measurements

| <b>hkl</b>                         | <b>d<sub>exp</sub></b> | <b>d<sub>calc</sub></b> |
|------------------------------------|------------------------|-------------------------|
|                                    | <b>[nm]</b>            | <b>[nm]</b>             |
| <b>100<math>\alpha</math></b>      | 0.49                   | 0.50                    |
| <b>10 <math>\alpha</math></b>      | 0.44                   | 0.44                    |
| <b>110/200 <math>\beta</math></b>  | 0.43                   | 0.43                    |
| <b>120/021 <math>\alpha</math></b> | 0.32                   | 0.32                    |

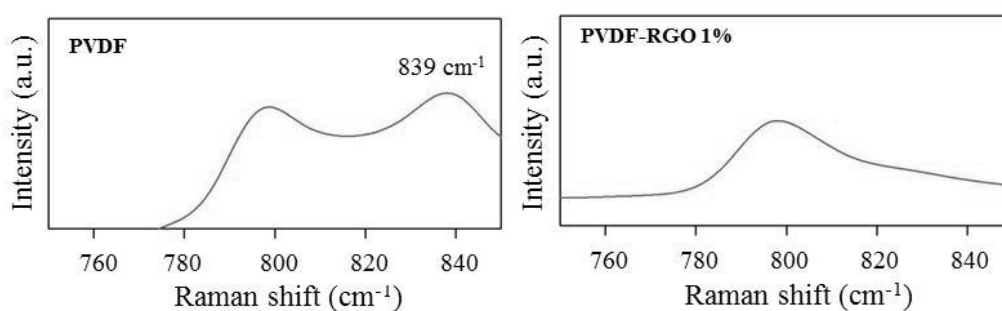

**Supplementary Figure S7.** Enlarged region of Raman spectra of PVDF and its RGO composite. The band located at 839 cm<sup>-1</sup>, which is strong on the  $\beta$ -phase,<sup>[1]</sup> is only observed in the pure PVDF matrix.

[1] Boccaccio, T.; Bottino, A.; Capannelli, G.; Piaggio, P. *Journal of Membrane Science* **2002**, 210, (2), 315-329.

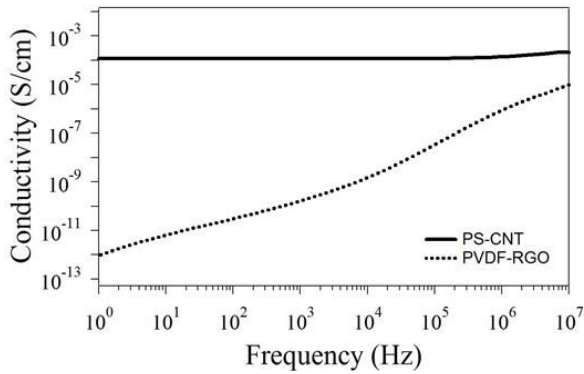

**Supplementary Figure S8** Broad band electrical conductivity,  $\sigma(F)$  as a function of frequency,  $F$ , for nanocomposites of PVDF-GNP and PS-CNT

Calculation of the buckling load according to Equation S1:

$$F = \frac{\pi^2 EI}{(KL)^2} \quad (S1)$$

$F$  = maximum or critical force (vertical load on column),

$E$  = modulus of elasticity,

$I$  = area moment of inertia of the cross section of the rod,

$L$  = unsupported length of pillar

$K$  = column effective length factor, whose value depends on the conditions of end support of the column. For both ends pinned (hinged, free to rotate),  $K = 1.0$ .

$D$  = pillar diameter

$KL$  is the effective length of the column.

$$E_{PS} = 3.2 \text{ GPa}$$

$$E_{PVDF} = 1.5 \text{ GPa}$$

$$I = \pi \frac{1}{64} \pi D^4$$

$$F_{PS} = \frac{\pi^2 3200 \text{ N/mm}^2 \pi \frac{1}{64} \pi (0.002)^4 \text{ mm}^4}{(1 \cdot 0.012)^2 \text{ mm}^2} = 172 \mu\text{N}$$

$$F_{PVDF} = \frac{\pi^2 1500 \text{ N/mm}^2 \pi \frac{1}{64} \pi (0.002)^4 \text{ mm}^4}{(1 \cdot 0.012)^2 \text{ mm}^2} = 81 \mu\text{N}$$
